1 **Evaluating the Association of Depressive Disorder Symptoms and Moral Injuries in**  
2 **Healthcare Workers during COVID-19 Pandemic**

3

4 Running title: Moral Injuries and Mental Health during Healthcare Crises

5

6 Authors: Amirhossein Behnampour <sup>1</sup>, Sedigheh Ebrahimi <sup>1\*</sup>, Amir Bazrafshan <sup>2</sup>, Amirhossein  
7 Kamyab <sup>3</sup>, Majid Pakdin <sup>4</sup>, Alireza Ebrahimi <sup>4</sup>

8

9 1. Department of Medical Ethics, Shiraz University of Medical Sciences, Shiraz, Iran

10 2. Department of Psychiatry, Shiraz University of Medical Sciences, Shiraz, Iran

11 3. Faculty of Medicine, Fasa University of Medical Sciences, Fasa, Iran

12 4. Student Research Committee, Shiraz University of Medical Sciences, Shiraz, Iran

13

14 \*Corresponding author: Sedigheh Ebrahimi, MD

15 Address: Department of Medical Ethics, Shiraz University of Medical Sciences, Karimkhan  
16 Zand St, Shiraz, Iran

17 E-mail: medres2022@outlook.com

18

19

20 ***Competing interest***

21 The authors confirm that there is no conflict of interest to declare.

22 ***Funding***

23 The authors received no financial support for the investigation and authorship.

24

25

26

27

28

1 **Abstract**

2  
3 **Background:** Moral injury occurs when negative distressing emotions appear and are  
4 suppressed. This could lead to several mental health problems such as depression and post-  
5 traumatic stress disorder, and result in long-lasting emotional, behavioral, and social problems.  
6 Moral injury, a term more commonly used in war contexts, has come into the spotlight during  
7 COVID-19 pandemic. We aimed to evaluate the rate of moral injury and its association with  
8 psychological injuries during this healthcare crisis.

9 **Methods:** We assessed the rates of depression, anxiety, stress, and their association with moral  
10 injury among 333 nurses, medical interns, and residents between December 2020 and January  
11 2021. This study was done using validated versions of Depression Anxiety Stress Scales (DASS-  
12 21) and Moral Injury Symptom Scale-Healthcare Professionals (MISS-HP) scores.

13 **Results:** Totally 333 healthcare professionals participated in this study, mostly aged between 26  
14 to 30 years old. Nearly half of the participants had a clinically significant moral injury. The  
15 average scores of anxiety and stress were significantly higher in women. The participants who  
16 were single showed higher rates of depression and moral injury than married ones. Moreover,  
17 anxiety, stress, depression, and moral injury were higher in nurses than other healthcare  
18 professionals. The scarcity of personal protective equipment at the workplace and giving care to  
19 patients with end-stage COVID-19 diagnosis were among the factors associated with a higher  
20 risk of developing mental health problems.

21 **Conclusion:** The results of this study showed that anxiety, stress, depression, and moral injury  
22 were prevalent among healthcare professionals during COVID-19 pandemic. Also, the rates of  
23 anxiety, stress, and depression were associated with moral injuries.

24  
25 **Keywords:** Healthcare Worker, Depression, Anxiety, Stress, Moral Injury, COVID-19,  
26 Pandemic

27

28

29

30

31

1

## 2 **1. Background**

3 Moral injury occurs when negative emotions such as anger, guilt, shame, and disgust about the  
4 world, self, and others appear and are suppressed [1]. This term originated in the war contexts  
5 and is considered to result from activities, or lack of them, which could violate one's ethical or  
6 moral code [2]. Commonly, moral injury is not categorized as a psychological disorder; however,  
7 it can lead to depression, post-traumatic stress disorder (PTSD), inability to function well, and  
8 even suicidal ideation [3]. The impacts of moral injury on individuals are not always  
9 recognizable, but the psychological damages caused by it may result in long-lasting emotional,  
10 behavioral, and social problems such as anger, depression, anxiety, burnout, and compassion  
11 fatigue [4].

12 Even after about four years since the first case of severe acute respiratory syndrome coronavirus  
13 2 (SARS-CoV-2) was diagnosed, the disease still leads to morbidity and mortality around the  
14 world [5, 6]. The social, political, and economic crises caused by coronavirus disease (COVID-  
15 19) could be compared to the 1918 influenza pandemic, as it threatened and impacted millions of  
16 lives globally [7, 8]. In addition to the socio-economic impacts, COVID-19 pandemic  
17 devastatingly affected the mental health of the general population; humans were shocked by the  
18 images that once had seemed like a horror tale, such as mass graves that occasionally happened  
19 in some countries [9].

20 During the pandemic, healthcare professionals (HCPs) were relatively more at risk of developing  
21 mental health problems because they had to execute medical interventions in complex  
22 circumstances, for example, when the appropriate resources were limited [3, 10]. In some cases,  
23 they had to isolate themselves and live far away from their families in order to decrease the risk  
24 of spreading the contagion to their relatives. Furthermore, HCPs were required to work long  
25 hours under extreme pressure, which, in turn, increased the chance of mental problems and moral  
26 injuries [11].

27 HCPs were at the frontlines, facing various stressors such as giving care to end-stage patients,  
28 being forced to wear masks and face shields for long hours, and fearing to spread the virus to  
29 their relatives. These stressors might result in psychological injuries, which subsequently could  
30 lead to lower quality of care for patients and decrease health status of general population [12]. In  
31 this study, we aimed to assess the prevalence of moral injuries and depressive disorders during  
32 COVID-19 pandemic. We also aimed to examine the association of depressive disorder  
33 symptoms and moral injury during this healthcare crisis.

## 1        2. Methods

### 2        2.1. Study Design and Population

3        This study was a cross-sectional survey-based study conducted on 333 HCPs between December  
4        2020 and January 2021 in educational hospitals affiliated with Shiraz University of Medical  
5        Sciences, Shiraz, Iran. The sampling method used was chain-referral sampling, which began  
6        from a group of nurses, medical interns, and residents that were invited to fill in the  
7        questionnaire. Afterwards, the initial group of participants were asked to distribute the online  
8        questionnaire among their colleagues.

### 9        2.2. Questionnaires

10       The HCPs were invited to participate in the study via social media platforms, and an online  
11       platform was used to gather the surveys. The questionnaire had three main components designed  
12       to gather the demographic characteristics, Depression Anxiety Stress Scales (DASS-21) and  
13       Moral Injury Symptom Scale-Healthcare Professionals version (MISS-HP) scores (**Suppl. 1-5**).

### 14       2.3. DASS-21 Questionnaire

15       DASS-21 is a self-reported screening instrument used for general population and patients,  
16       providing measures of depression, anxiety, and stress, independently [13]. The depression  
17       subscale investigates dysphoria, hopelessness, devaluation of life, self-depreciation, lack of  
18       interest, anhedonia, and inertia. The anxiety subscale measures autonomic arousal,  
19       musculoskeletal effects, situational anxiety, and subjective experience of anxious effect. Stress  
20       subscale evaluates difficulty relaxing, nervous arousal, being easily upset or agitated, and  
21       irritability. Each subscale has seven items rated on a 4-point Likert scale (0-3), total score  
22       averaging from 0 to 63, and a higher score indicates higher depression, anxiety, and stress levels.  
23       The severity levels of symptoms could be indicated by the score in each domain [14]. The cross-  
24       cultural validity of the DASS-21-Persian as a measure of related symptoms among the general  
25       population in Iran has been evaluated in previous studies [15]. DASS-21-Persian internal  
26       consistency was calculated using Cronbach's alpha ( $\alpha$ ) which was an acceptable rate of 0.94  
27       [16].

### 28       2.4. MISS-HP Questionnaire

29       MISS-HP is a 10-item questionnaire that covers various dimensions of moral injury. Each item  
30       has response choices ranging on a 10-point Likert scale from 1 ("absolutely disagree") to 10  
31       ("absolutely agree"). A total score ranges from 10 to 100, and higher scores are an indicator of

1 more significant moral injury [17]. In order to use MISS-HP in our study, it was translated into  
2 the Persian version, and the subsequent questionnaire was validated by a pilot study.

3 Receiver operator curve (ROC) was conducted to identify the proper cutoff on the MISS-HP-  
4 Persian, which could be used to diagnose healthcare professionals with symptoms of clinically  
5 significant moral injuries (**Suppl. 6**). The optimum score for a cutoff point on the MISS-HP-  
6 Persian to identify healthcare professionals with clinically significant moral injury symptoms  
7 was 42 or higher, according to Youden's index from the ROC. With this cutoff point  
8 determination, the sensitivity and specificity for detecting moral injury symptoms accompanied  
9 by significant functional impairment were 70% and 63%, respectively (positive predictive value:  
10 53%, negative predictive value: 79%).

11 Content validity assessment of the MISS-HP-Persian was evaluated qualitatively and  
12 quantitatively. To assess the qualitative content validity, the MISS-HP-Persian was given to  
13 thirty-five experts who were asked to leave a comment on the scale items regarding item  
14 allocation, wording, scaling, and grammar. The MISS-HP-Persian final version was created after  
15 analyzing and applying their remarks. For quantitative content validity, we used Content Validity  
16 Ratio (CVR) defining the necessity of items and Content Validity Index (CVI) defining the  
17 relevance of items (**Suppl. 7**). The experts were asked to rate the need of the MISS-HP items  
18 based on a 3-point Likert-type scale consisting of “necessary”, “useful but not necessary”, and  
19 “not necessary”. Additionally, they were asked to rate the relevance of items on a 4-point Likert-  
20 type scale. The method of content validation is based on previous publications [18]. The  
21 questionnaire's internal consistency was also calculated using Cronbach's alpha ( $\alpha$ ) as an  
22 acceptable rate of 0.73 [16].

### 23 *2.5. Statistical analysis*

24 All statistical analysis was performed using SPSS version 24.0. Mean and standard deviation  
25 (SD) was used to present continuous variables, while categorical variables were shown as  
26 numbers and percentage. Univariate analysis was done using independent *t*-test, and Pearson and  
27 Spearman correlation coefficient test. Multivariable analysis was also done after checking  
28 variance inflation factor (VIF) and collinearity using One-Way ANOVA (Analysis of Variance).  
29 P values < 0.05 was considered as the significance level.

### 30 *2.6. Ethical Considerations*

31 This study protocol was approved by the Medical Ethics Committee of Shiraz University of  
32 Medical Sciences (Reg. no. 21417). The participants were asked to fill out an informed consent  
33 that was provided at the beginning of the questionnaire. The anonymity and secrecy of the  
34 participants were guaranteed.

### 1           3. Results

2       A total number of 333 healthcare professionals participated in this study, mostly in the 26 to 30  
3       years age group (n=147, 44.1%). The study population consisted of 107 nurses (32.1%), 125  
4       medical interns (37.5%), and 101 medical residents (30.3%). Among participants, 195 were  
5       female (58.6%), and 138 were male (41.1%). More than half of the responders were single  
6       (61.6%). **Table 1** represents the occupational and demographic characteristics of the  
7       respondents.

8       **Table 2** demonstrates the results of DASS-21 Persian questionnaire distributed among the  
9       participants. Moderate to extremely severe anxiety was detected in 23 (16.7%) of male  
10      participants. The rate was 52 (37.7%) and 35 (25.4%) for stress and depression in male  
11      participants, respectively. Meanwhile, anxiety, stress, and depression were diagnosed in 45  
12      (23.1%), 78 (40%), and 56 (28.7%) female participants, respectively.

13     As presented in **Table 3**, the average scores of anxiety and stress were significantly higher in  
14     women (p-value<0.05). However, the mean value of depression score in the two gender groups  
15     was not significantly different (p-value=0.063). The average score of depression had a significant  
16     difference between single and married participants (p-value=0.007); while, anxiety and stress  
17     had no significant relationship with marital status (p-value>0.05). The average score of  
18     depression, anxiety, and stress among the participants had a significant difference according to  
19     the type of profession, and nurses experienced more depression, anxiety, and stress than other  
20     professionals (p-value<0.05). Our findings also indicated that the lack of personal protective  
21     equipment (PPE) at the workplace increases depression, anxiety, and stress (p-value<0.05).  
22     Moreover, the average score of depression and stress has a significant relationship with the work  
23     experience with the death of COVID-19 patients (p-value<0.05) (**Table 3**).

24     According to the results of this study, almost half of the participants had clinically significant  
25     moral injury (**Table 4**). Based on our findings, female participants had higher rates of moral  
26     injury than their male counterparts (p-value=0.018) (**Table 5**). As shown in **Table 5**, single  
27     participants suffered more moral injury than married ones (p-value=0.044). Our results also  
28     demonstrated that moral injury was significantly higher in nurses compared to other health care  
29     professionals (p-value=0.007). Furthermore, moral injury was significantly correlated with the  
30     inadequacy of PPE at the workplace as well (p-value=0.0001) (**Table 5**). We have also observed  
31     that moral injury outcomes were positively correlated with depression, anxiety, and stress scores  
32     (p-value<0.05) (**Table 6**).

### 33           4. Discussion

1 This study assessed the prevalence of moral injuries, stress, anxiety, and depression among HCPs  
2 during the COVID-19 pandemic. The prevalence of anxiety in the study population was 20.4%,  
3 consistent with previous studies' findings in Italy, China, and India [19-21]. In our study, the  
4 prevalence of depression was 27.3%, comparable to the findings of Rossi et al. study [19]. Other  
5 studies also observed increased level of anxiety and depression among HCPs at the frontlines of  
6 outbreaks, for example, among volunteers treating patients with Ebola in West Africa [22]. In  
7 our study, 39.1% of participants had moderate to highly severe stress symptoms, which is  
8 significantly higher than the corresponding rate found by Lenzo *et al.* using the same assessing  
9 tool [23]. These variations could be explained by the phase of the outbreak when studies were  
10 conducted. As we conducted our study between the third and fourth peaks of the pandemic in  
11 Iran, higher rates might be due to increased burden on healthcare systems during the peak phase  
12 of the outbreak. The duration and degree of exposure to COVID-19 patients, type of study,  
13 characteristics of the population participating in the study, assessing tool, and sociocultural  
14 differences are among other factors which could lead to variation in the findings of different  
15 studies.

16 Our results showed that about one out of two HCPs was suffering from moral injury during  
17 COVID-19 pandemic, and also 49.1 percent of all the participants had clinically significant  
18 moral injury. These findings are consistent with previous evidence showing a major proportion  
19 of HCPs are at risk of moral injury during the pandemic [24].

20 In this study, although female participants were more at risk of developing anxiety, stress, and  
21 moral injury, no significant difference was found in the levels of depression in different genders.  
22 Previously, Wang *et al.* reported that female HCPs were more vulnerable to moral damage  
23 during COVID-19 pandemic [24]. Additionally, previous investigations showed a higher  
24 prevalence of anxiety, stress and depression in female HCPs, during the pandemic [25, 26]. The  
25 higher levels of these psychological distresses among women were also seen in general  
26 population, and it is assumed that women are more vulnerable to develop anxiety, stress, and  
27 depression than men [27-29].

28 The results of our study showed that the level of depression and moral injury was significantly  
29 lower in the married participants. In line with our results, in Wang *et. al* reported lower rates of  
30 in married healthcare workers [24]. Similarly, married individuals showed higher levels of  
31 resilience against anxiety, stress, and depression during COVID-19 pandemic [25]. Previous  
32 studies also considered this factor as a risk for developing depression, caused due to several  
33 social and psychological reasons [30-32].

1 The results obtained from the present study showed that there was a significant relationship  
2 between the type of profession and the level of anxiety, stress, depression and moral injury. In  
3 consistent with previous published evidence, our study indicated that nurses suffered from  
4 anxiety, stress, depression and moral injury more than the medical interns and residents [24].  
5 This difference might be because they spend more hours providing medical services for patients  
6 with COVID-19 than medical interns and residents. Xiao *et al.* also observed higher prevalence  
7 of anxiety and depression among nurses, however, the difference was not significant between  
8 different groups of HCPs [33].

9 The lack of PPE in the workplace increased the participants' level of anxiety, stress, depression,  
10 and moral damage. This finding is consistent with previous reports that indicated the inadequacy  
11 of PPE significantly increased the level of anxiety and depression among HCPs [33]. Adequate  
12 provide of PPE against infection was also related to mitigated anxiety and depression in HCPs, in  
13 other studies [34]. The fear of contracting the virus and spreading it due to the lack of protective  
14 equipment might be the cause of this heightened rates of anxiety and depression.

15 We also observed that HCPs who experienced working with end-stage patients fighting COVID-  
16 19 had higher levels of stress and depression. In this regard, previous studies have found a strong  
17 correlation between death anxiety and mental disorders such as depression [35]. Unsurprisingly,  
18 the physicians might sympathize with these patients, subsequently leading to feelings of fear,  
19 grieve, and depression.

20 Our findings showed a significant correlation between self-reported depressive symptoms and  
21 moral injury in the study population. This finding was consistent with a recent study evaluating  
22 an association between psychiatric symptoms and moral injury among HCPs during COVID-19  
23 pandemic [36]. Previous studies also demonstrated an association between psychopathology and  
24 moral injury among military veterans [2, 37-41]. Furthermore, trauma-related stress has been  
25 highlighted in a recent review evaluating traumatic responses among HCPs during the COVID-  
26 19 outbreak [42]. Consistent with the findings of Asalem *et al.*, we found that the effects of  
27 COVID-19 pandemic on HCPs simulate the impacts following a traumatic event [36]. This  
28 concern was also evaluated by Ahmed *et al.* regarding Ebola and Swine flu, and noticed a rising  
29 apprehension towards these outbreaks [43]. Other publications have also highlighted the  
30 importance of moral injury among HCPs during the pandemic [44-47].

31 We found that the prevalence of anxiety, stress, depression, and moral injury was considerably  
32 high during COVID-19 pandemic. Also, the rates of anxiety, stress, and depression were  
33 associated with moral injury scores. Several factors might be related to this increased rates such  
34 as inadequacy of PPE. However, more studies need to be done to find the reasons that might lead



1 to increased risk of developing these responses. Healthcare policymakers and other stakeholders  
2 also need to implement strategies to mitigate this concern. This might be achieved by providing  
3 adequate sufficient resources (e.g. PPE) and support (e.g. mental health screening) for the  
4 healthcare providers during healthcare crises. Providing a supportive environment is of  
5 paramount importance [48, 49].

6 There are several limitations to our study: While the participants were from all section of the  
7 hospitals, there is a possibility of selection bias, as our study was a web-based survey. Findings  
8 are limited to the population that sample size was derived from, who may not represent the  
9 whole HCPs in other regions of the world. Furthermore, our assessment was based on self-report  
10 questionnaires which do not meet the accuracy of a formal diagnostic interview.

## 11 **5. Conclusion**

12 The results of this study showed that anxiety, stress, depression and moral injury are prevalent  
13 among HCPs during COVID-19 pandemic, and moral injuries associated with the level of  
14 anxiety, stress and depression among the participants. Female HCPs showed higher prevalence  
15 of anxiety and stress during the pandemic than their male counterparts. Additionally, being  
16 married could be a protective factor against depression and moral injury. Different levels of  
17 anxiety, stress, depression, and moral injuries were observed in participants with different  
18 positions, and nurses were more vulnerable to developing these problems. Having encountered  
19 with end-stage patients and inadequacy of resources such as PPE were other factors leading to  
20 increased anxiety, stress, depression, and moral injury rates during the crisis.

21 A growing body of evidence suggests that the prevalence of mental health disorders, including  
22 anxiety, depression, and stress has increased among HCPs since COVID-19 eruption. The  
23 present study has also highlighted the increased prevalence and significance of moral injuries in  
24 this population. These problems could lead to decreased quality of care received by the general  
25 public, subsequently resulting in lowered public health [50]. Further research is needed to find  
26 proper policies that could be implemented to reduce the consequences of this high amount of  
27 moral injuries among HCPs. Researchers and policymakers should take reasonable steps to  
28 determine the severity and scope of the problem and try to prevent and resolve this problem in  
29 future pandemics, which can be even more widespread and fatal. Regular therapy visits, giving  
30 reassurance to HCPs by expert psychologists, and mindfulness training are some examples that  
31 have been successful in reducing psychological complications in other pandemics [46, 51, 52].

## 32 **6. References**

- 1 1. Browne, T., M. Evangelini and N. Greenberg. "Trauma-related guilt and posttraumatic stress  
2 among journalists." *Journal of Traumatic Stress* 25 (2012): 207-10.
- 3 2. Litz, B. T., N. Stein, E. Delaney, L. Lebowitz, W. P. Nash, C. Silva and S. Maguen. "Moral  
4 injury and moral repair in war veterans: A preliminary model and intervention strategy." *Clinical  
5 psychology review* 29 (2009): 695-706.
- 6 3. Williamson, V., D. Murphy and N. Greenberg. *Covid-19 and experiences of moral injury in front-  
7 line key workers*. 70. Oxford University Press UK, 2020, 317-19.
- 8 4. Drescher, K. D., J. A. Nieuwsma and P. J. Swales. "Morality and moral injury: Insights from  
9 theology and health science." *Reflective Practice: Formation and Supervision in Ministry* 33  
10 (2013): 50-61.
- 11 5. 2022. <https://www.worldometers.info/coronavirus/>. 2022, June 24
- 12 6. WHO. *Who coronavirus (covid-19) dashboard*. World Health Organization, 2022,
- 13 7. Liang, S. T., L. T. Liang and J. M. Rosen. *Covid-19: A comparison to the 1918 influenza and how  
14 we can defeat it*. 97. The Fellowship of Postgraduate Medicine, 2021, 273-74.
- 15 8. Ebrahimi, A., S. Ebrahimi and S. A. Esfahani. "How covid-19 pandemic can lead to promotion of  
16 remote medical education and democratization of education?" *Journal of Advances in Medical  
17 Education & Professionalism* 8 (2020): 144.
- 18 9. Entress, R. M., J. Tyler and A. A. Sadiq. "Managing mass fatalities during covid-19: Lessons for  
19 promoting community resilience during global pandemics." *Public Administration Review* 80  
20 (2020): 856-61.
- 21 10. Čartolovni, A., M. Stolt, P. A. Scott and R. Suhonen. "Moral injury in healthcare professionals: A  
22 scoping review and discussion." *Nursing ethics* 28 (2021): 590-602.
- 23 11. Greenberg, N., M. Docherty, S. Gnanapragasam and S. Wessely. "Managing mental health  
24 challenges faced by healthcare workers during covid-19 pandemic." *bmj* 368 (2020):
- 25 12. Stuijtzand, S., C. Deforges, V. Sandoz, C.-T. Sajin, C. Jaques, J. Elmers and A. Horsch.  
26 "Psychological impact of an epidemic/pandemic on the mental health of healthcare professionals:  
27 A rapid review." *BMC public health* 20 (2020): 1-18.
- 28 13. Lovibond, S. H. and P. F. Lovibond. *Manual for the depression anxiety stress scales*. Psychology  
29 Foundation of Australia, 1996,
- 30 14. Alfnsson, S., E. Wallin and P. Maathz. "Factor structure and validity of the depression, anxiety  
31 and stress scale-21 in swedish translation." *Journal of Psychiatric and Mental Health Nursing*  
32 24 (2017): 154-62.
- 33 15. Sahebi, A., M. J. Asghari and R. S. Salari. "Validation of depression anxiety and stress scale  
34 (dass-21) for an iranian population." (2005):
- 35 16. Cronbach, L. J. "Coefficient alpha and the internal structure of tests." *psychometrika* 16 (1951):  
36 297-334.
- 37 17. Mantri, S., J. M. Lawson, Z. Wang and H. G. Koenig. "Identifying moral injury in healthcare  
38 professionals: The moral injury symptom scale-hp." *Journal of Religion and Health* 59 (2020):  
39 2323-40.
- 40 18. Yaghmaie, F. "Content validity and its estimation." *Journal of medical education* 3 (2003):
- 41 19. Rossi, R., V. Socci, F. Pacitti, G. Di Lorenzo, A. Di Marco, A. Siracusano and A. Rossi. "Mental  
42 health outcomes among frontline and second-line health care workers during the coronavirus  
43 disease 2019 (covid-19) pandemic in italy." *JAMA network open* 3 (2020): e2010185-e85.
- 44 20. Liu, Z., B. Han, R. Jiang, Y. Huang, C. Ma, J. Wen, T. Zhang, Y. Wang, H. Chen and Y. Ma.  
45 "Mental health status of doctors and nurses during covid-19 epidemic in china." *Available at  
46 SSRN 3551329* (2020):

- 1 21. Sharma, G., P. Sharma, B. Mohan, A. Agarwal, S. Lama, M. Jat, K. Biju, P. Upadhyay, A. Gupta  
2 and S. Mohanty. "Prevalence of psychological outcomes and its associated factors in healthcare  
3 personnel working during covid-19 outbreak in india." *Indian Journal of Psychiatry* 64 (2022):  
4 151-58.
- 5 22. Gershon, R., L. A. Dernehl, E. Nwankwo, Q. Zhi and K. Qureshi. "Experiences and psychosocial  
6 impact of west africa ebola deployment on us health care volunteers." *PLoS currents* 8 (2016):
- 7 23. Lenzo, V., M. C. Quattropiani, A. Sardella, G. Martino and G. A. Bonanno. "Depression, anxiety,  
8 and stress among healthcare workers during the covid-19 outbreak and relationships with  
9 expressive flexibility and context sensitivity." *Frontiers in Psychology* 12 (2021): 348.
- 10 24. Wang, Z., K. G. Harold, Y. Tong, J. Wen, M. Sui, H. Liu, F. A. Zaben and G. Liu. "Moral injury  
11 in chinese health professionals during the covid-19 pandemic." *Psychological Trauma: Theory,  
12 Research, Practice, and Policy* 14 (2022): 250.
- 13 25. Elbay, R. Y., A. Kurtulmuş, S. Arpacioğlu and E. Karadere. "Depression, anxiety, stress levels of  
14 physicians and associated factors in covid-19 pandemics." *Psychiatry Research* 290 (2020):  
15 113130.
- 16 26. Özdin, S. and Ş. Bayrak Özdin. "Levels and predictors of anxiety, depression and health anxiety  
17 during covid-19 pandemic in turkish society: The importance of gender." *International Journal of  
18 Social Psychiatry* 66 (2020): 504-11.
- 19 27. Albert, P. R. "Why is depression more prevalent in women?" *Journal of psychiatry &  
20 neuroscience: JPN* 40 (2015): 219.
- 21 28. McLean, C. P., A. Asnaani, B. T. Litz and S. G. Hofmann. "Gender differences in anxiety  
22 disorders: Prevalence, course of illness, comorbidity and burden of illness." *Journal of  
23 psychiatric research* 45 (2011): 1027-35.
- 24 29. Costa, C., G. Briguglio, S. Mondello, M. Teodoro, M. Pollicino, A. Canalella, F. Verduci, S.  
25 Italia and C. Fenga. "Perceived stress in a gender perspective: A survey in a population of  
26 unemployed subjects of southern italy." *Frontiers in Public Health* 9 (2021): 640454.
- 27 30. Kessler, R. C. and M. Essex. "Marital status and depression: The importance of coping  
28 resources." *Social forces* 61 (1982): 484-507.
- 29 31. Yan, X. Y., S. Huang, C.-Q. Huang, W.-H. Wu and Y. Qin. "Marital status and risk for late life  
30 depression: A meta-analysis of the published literature." *Journal of International Medical  
31 Research* 39 (2011): 1142-54.
- 32 32. Buckman, J. E., R. Saunders, J. Stott, L.-L. Arundell, C. O'Driscoll, M. R. Davies, T. C. Eley, S.  
33 D. Hollon, T. Kendrick and G. Ambler. "Role of age, gender and marital status in prognosis for  
34 adults with depression: An individual patient data meta-analysis." *Epidemiology and psychiatric  
35 sciences* 30 (2021):
- 36 33. Xiao, X., X. Zhu, S. Fu, Y. Hu, X. Li and J. Xiao. "Psychological impact of healthcare workers in  
37 china during covid-19 pneumonia epidemic: A multi-center cross-sectional survey investigation."  
38 *Journal of affective disorders* 274 (2020): 405-10.
- 39 34. Maciaszek, J., M. Ciulkowicz, B. Misiak, D. Szczesniak, D. Luc, T. Wieczorek, K. Fila-Witecka,  
40 P. Gawlowski and J. Rymaszewska. "Mental health of medical and non-medical professionals  
41 during the peak of the covid-19 pandemic: A cross-sectional nationwide study." *Journal of  
42 Clinical Medicine* 9 (2020): 2527.
- 43 35. Menzies, R. E., L. Sharpe and I. Dar□Nimrod. "The relationship between death anxiety and  
44 severity of mental illnesses." *British Journal of Clinical Psychology* 58 (2019): 452-67.

- 1 36. Amsalem, D., A. Lazarov, J. C. Markowitz, A. Naiman, T. E. Smith, L. B. Dixon and Y. Neria.  
2 "Psychiatric symptoms and moral injury among us healthcare workers in the covid-19 era." *BMC*  
3 *psychiatry* 21 (2021): 1-8.
- 4 37. Neria, Y. and A. Pickover. "Commentary on the special issue on moral injury: Advances, gaps in  
5 literature, and future directions." *Journal of Traumatic Stress* 32 (2019): 459-64.
- 6 38. Currier, J. M., J. M. Holland and J. Malott. "Moral injury, meaning making, and mental health in  
7 returning veterans." *Journal of clinical psychology* 71 (2015): 229-40.
- 8 39. Frankfurt, S. and P. Frazier. "A review of research on moral injury in combat veterans." *Military*  
9 *psychology* 28 (2016): 318-30.
- 10 40. Bryan, C. J., A. O. Bryan, M. D. Anestis, J. C. Anestis, B. A. Green, N. Etienne, C. E. Morrow  
11 and B. Ray-Sannerud. "Measuring moral injury: Psychometric properties of the moral injury  
12 events scale in two military samples." *Assessment* 23 (2016): 557-70.
- 13 41. Lancaster, S. L. and J. I. Harris. "Measures of morally injurious experiences: A quantitative  
14 comparison." *Psychiatry research* 264 (2018): 15-19.
- 15 42. Benfante, A., M. Di Tella, A. Romeo and L. Castelli. "Traumatic stress in healthcare workers  
16 during covid-19 pandemic: A review of the immediate impact." *Frontiers in Psychology* 11  
17 (2020): 2816.
- 18 43. Ahmed, W., P. A. Bath, L. Sbaffi and G. Demartini. "Moral panic through the lens of twitter: An  
19 analysis of infectious disease outbreaks." Presented at Proceedings of the 9th International  
20 Conference on Social Media and Society, 2018. 217-21.
- 21 44. Lesley, M. "Psychoanalytic perspectives on moral injury in nurses on the frontlines of the covid-  
22 19 pandemic." *Journal of the American Psychiatric Nurses Association* 27 (2021): 72-76.
- 23 45. Borges, L. M., S. M. Barnes, J. K. Farnsworth, N. H. Bahraini and L. A. Brenner. "A commentary  
24 on moral injury among health care providers during the covid-19 pandemic." *Psychological*  
25 *Trauma: Theory, Research, Practice, and Policy* 12 (2020): S138.
- 26 46. Williams, R. D., J. A. Brundage and E. B. Williams. "Moral injury in times of covid-19." *Journal*  
27 *of health service psychology* 46 (2020): 65-69.
- 28 47. Roycroft, M., D. Wilkes, S. Pattani, S. Fleming and A. Olsson-Brown. *Limiting moral injury in*  
29 *healthcare professionals during the covid-19 pandemic*. 70. Oxford University Press UK, 2020,  
30 312-14.
- 31 48. Clement, S., O. Schauman, T. Graham, F. Maggioni, S. Evans-Lacko, N. Bezborodovs, C.  
32 Morgan, N. Rüsçh, J. S. Brown and G. Thornicroft. "What is the impact of mental health-related  
33 stigma on help-seeking? A systematic review of quantitative and qualitative studies."  
34 *Psychological medicine* 45 (2015): 11-27.
- 35 49. Center, C., M. Davis, T. Detre, D. E. Ford, W. Hansbrough, H. Hendin, J. Laszlo, D. A. Litts, J.  
36 Mann and P. A. Mansky. "Confronting depression and suicide in physicians: A consensus  
37 statement." *Jama* 289 (2003): 3161-66.
- 38 50. Landrigan, C. P., J. M. Rothschild, J. W. Cronin, R. Kaushal, E. Burdick, J. T. Katz, C. M. Lilly,  
39 P. H. Stone, S. W. Lockley and D. W. Bates. "Effect of reducing interns' work hours on serious  
40 medical errors in intensive care units." *New England Journal of Medicine* 351 (2004): 1838-48.
- 41 51. Epstein, E. G. and A. B. Hamric. "Moral distress, moral residue, and the crescendo effect." *The*  
42 *Journal of clinical ethics* 20 (2009): 330-42.
- 43 52. Hempel, S., S. L. Taylor, N. J. Marshall, I. M. Miake-Lye, J. M. Beroes, R. Shanman, M. R.  
44 Solloway and P. G. Shekelle. "Evidence map of mindfulness." (2015):

45

1        **7. Tables**

2

| <b>Table 1. Occupational and demographic characteristics of participants (n=333)</b> |              |
|--------------------------------------------------------------------------------------|--------------|
| <b>Variable</b>                                                                      | <b>N (%)</b> |
| <b>Sex, n (%)</b>                                                                    |              |
| Female                                                                               | 195 (58.6)   |
| Male                                                                                 | 138 (41.4)   |
| <b>Age group</b>                                                                     |              |
| 21-25 years old                                                                      | 106 (31.8)   |
| 25-30 years old                                                                      | 147 (44.1)   |
| >30 years old                                                                        | 80 (24.0)    |
| <b>Marital status</b>                                                                |              |
| Single                                                                               | 205 (61.6)   |
| Married                                                                              | 128 (38.4)   |
| <b>Professional category</b>                                                         |              |
| <b>Medical Interns</b>                                                               | 125 (37.5)   |
| <b>Medical Residents</b>                                                             | 101 (30.3)   |
| <b>Nurses</b>                                                                        | 107 (32.1)   |
| <b>Years in profession</b>                                                           |              |
| 1-3 year                                                                             | 200 (60.1)   |
| 4-7 year                                                                             | 94 (28.2)    |
| >7 year                                                                              | 39 (11.7)    |

3

1

| <b>Table 2. The severity of depression, anxiety, and stress symptoms in participants</b> |                      |                        |                        |
|------------------------------------------------------------------------------------------|----------------------|------------------------|------------------------|
| <b>Severity</b>                                                                          | <b>Males (N=138)</b> | <b>Females (N=195)</b> | <b>Overall (N=333)</b> |
| <b>Depression</b>                                                                        |                      |                        |                        |
| Normal                                                                                   | 87 (63%)             | 117 (60%)              | 204 (61.3%)            |
| Mild                                                                                     | 16 (11.6%)           | 22 (11.3%)             | 38 (11.4%)             |
| Moderate                                                                                 | 19 (13.6%)           | 36 (18.5%)             | 55 (16.5%)             |
| Severe                                                                                   | 7 (5.1%)             | 17 (8.7%)              | 24 (7.2%)              |
| Extremely Severe                                                                         | 9 (6.5%)             | 3 (1.5%)               | 12 (3.6%)              |
| <b>Anxiety</b>                                                                           |                      |                        |                        |
| Normal                                                                                   | 92 (66.7%)           | 135 (69.2%)            | 227 (68.2%)            |
| Mild                                                                                     | 23 (16.7%)           | 15 (7.7%)              | 38 (11.4%)             |
| Moderate                                                                                 | 15 (10.9%)           | 23 (11.8%)             | 38 (11.4%)             |
| Severe                                                                                   | 4 (2.9%)             | 14 (7.2%)              | 18 (5.4%)              |
| Extremely Severe                                                                         | 4 (2.9%)             | 8 (4.1%)               | 12 (3.6%)              |
| <b>Stress</b>                                                                            |                      |                        |                        |
| Normal                                                                                   | 67 (48.6%)           | 85 (43.6%)             | 152 (45.6%)            |
| Mild                                                                                     | 19 (13.8%)           | 32 (16.4%)             | 51 (15.3%)             |
| Moderate                                                                                 | 31 (22.5%)           | 39 (20%)               | 70 (21.0%)             |
| Severe                                                                                   | 13 (9.4%)            | 27 (13.8%)             | 40 (12.0%)             |
| Extremely Severe                                                                         | 8 (5.8%)             | 12 (6.2%)              | 20 (6.0%)              |

1  
2

| Table 3. The relationship between demographic variables and depression, anxiety, and stress |                   |                           |         |                        |         |                    |         |
|---------------------------------------------------------------------------------------------|-------------------|---------------------------|---------|------------------------|---------|--------------------|---------|
| Variable                                                                                    |                   | Depression<br>(mean ± SD) | P-value | Anxiety<br>(mean ± SD) | P-value | Stress (mean ± SD) | P-value |
| Gender                                                                                      | Male              | 6.61 ± 5.33               | *0.063  | 4.47 ± 4.11            | *0.001  | 8.35 ± 5.06        | *0.001  |
|                                                                                             | Female            | 7.72 ± 5.38               |         | 6.21 ± 4.76            |         | 10.35 ± 4.97       |         |
| Marital Status                                                                              | Single            | 7.89 ± 5.54               | *0.007  | 5.51 ± 4.65            | *0.902  | 9.81 ± 5.09        | *0.203  |
|                                                                                             | Married           | 6.26 ± 4.97               |         | 5.45 ± 4.47            |         | 9.07 ± 5.11        |         |
| Type of Profession                                                                          | Nurses            | 8.81 ± 5.79               | **0.001 | 7.64 ± 5.51            | **0.001 | 10.81 ± 5.18       | **0.006 |
|                                                                                             | Medical Interns   | 6.80 ± 5.34               |         | 4.32 ± 3.56            |         | 9.00 ± 5.12        |         |
|                                                                                             | Medical Residents | 6.20 ± 4.60               |         | 4.66 ± 3.77            |         | 8.83 ± 4.78        |         |
| Adequacy of Personal Protective Equipment                                                   | Yes               | 6.54 ± 5.02               | *0.004  | 4.97 ± 4.27            | *0.014  | 8.66 ± 4.86        | *0.0001 |
|                                                                                             | No                | 8.28 ± 5.71               |         | 6.21 ± 4.89            |         | 10.74 ± 5.21       |         |
| Work Experience with the Death of COVID-19 Patients                                         | Yes               | 7.69 ± 5.48               | *0.047  | 5.74 ± 4.73            | *0.169  | 9.98 ± 5.10        | *0.028  |
|                                                                                             | No                | 6.46 ± 5.11               |         | 5.01 ± 4.24            |         | 8.68 ± 5.02        |         |

3 \*Independent t-test  
4 \*\*One-Way ANOVA

5

1  
2  
3

| Table 4. Moral injury outcome           |                     |
|-----------------------------------------|---------------------|
| Moral injury outcomes                   | n ( %) or Mean (SD) |
| Score obtained in MISS-HP               | 41.51 (12.96)       |
| Clinically significant moral injury     | 165 (49.6)          |
| Non-clinically significant moral injury | 168 (50.4)          |

4

| Table 5. The relationship between demographic variables and moral injury |                   |                          |         |
|--------------------------------------------------------------------------|-------------------|--------------------------|---------|
| Variable                                                                 |                   | Moral Injury (mean ± SD) | P-value |
| Gender                                                                   | Male              | 39.51 ± 11.81            | *0.018  |
|                                                                          | Female            | 42.92 ± 13.56            |         |
| Marital Status                                                           | Single            | 42.63 ± 12.86            | *0.044  |
|                                                                          | Married           | 39.70 ± 12.95            |         |
| Type of Profession                                                       | Nurses            | 44.01 ± 13.33            | **0.007 |
|                                                                          | Medical Interns   | 41.88 ± 11.86            |         |
|                                                                          | Medical Residents | 38.39 ± 13.34            |         |
| Adequacy of Personal Protective Equipment                                | Yes               | 39.26 ± 12.75            | *0.0001 |
|                                                                          | No                | 44.64 ± 12.63            |         |
| Work Experience with the Death of COVID-19 Patients                      | Yes               | 42.37 ± 13.18            | *0.095  |
|                                                                          | No                | 39.87 ± 12.42            |         |

5 \*Independent t-test

6 \*\*One-Way ANOVA



| <b>Disorder</b>   | <b>Correlation with moral injury</b> | <b>*P value</b> |
|-------------------|--------------------------------------|-----------------|
| <b>Depression</b> | 0.471                                | 0.001           |
| <b>Anxiety</b>    | 0.430                                | 0.001           |
| <b>Stress</b>     | 0.464                                | 0.001           |

\* Pearson correlation coefficient test

## **8. Supplementary**

### **8.1.Suppl 1. Demographic Information Questionnaire**

1. Age:
2. Gender:
3. Marital Status:
4. Type of profession:                    Nurse                     Medical Intern                     Medical Resident
5. Duration of service as a health care professional:
6. Are you provided with sufficient personal protective equipment at workplace?
7. Have you ever worked in the wards where patients with COVID-19 were hospitalized?
8. How long have you been working in the wards where patients with COVID-19 were hospitalized?
9. Have you or your relatives been infected with COVID-19?
10. If you or your relatives have ever been infected or been hospitalized because of COVID-19?
11. Have you ever had a close work experience with the COVID-19 patients?

### **8.2. Suppl 2. DASS-21**

### **8.3. Suppl 3. DASS Severity Ratings**

### **8.4. Suppl 4. DASS-21 Domain Score**

### **8.5. Suppl 5. MISS□HF**

### **8.6. Suppl 6. ROC for MISS-HP-Persian**

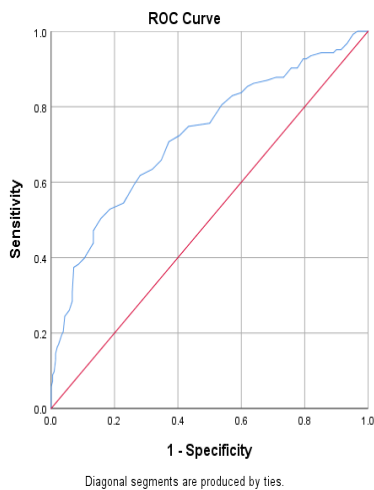

1
